# Supplementary material
Source: PubMed Central journal article supplement (PMC3735655)
Supplement: NIHMS491075-supplement-Supporting_materials.pdf [file NIHMS491075-supplement-Supporting_materials.pdf]

## **SUPPLEMENTARY MATERIAL**

### **Co-presentation of antigen and ligands of Siglec-G induces B cell tolerance independent of CD22**

Fabian Pfrengle, Matthew S. Macauley, Norihito Kawasaki, and James C. Paulson\*

Department of Cell and Molecular Biology  
Joint Department of Chemical Biology  
The Scripps Research Institute  
La Jolla, CA 92037 (USA)

\*To whom correspondence should be addressed: e-mail: [jpaulson@scripps.edu](mailto:jpaulson@scripps.edu);

Fax: (+1) 858-784-9690

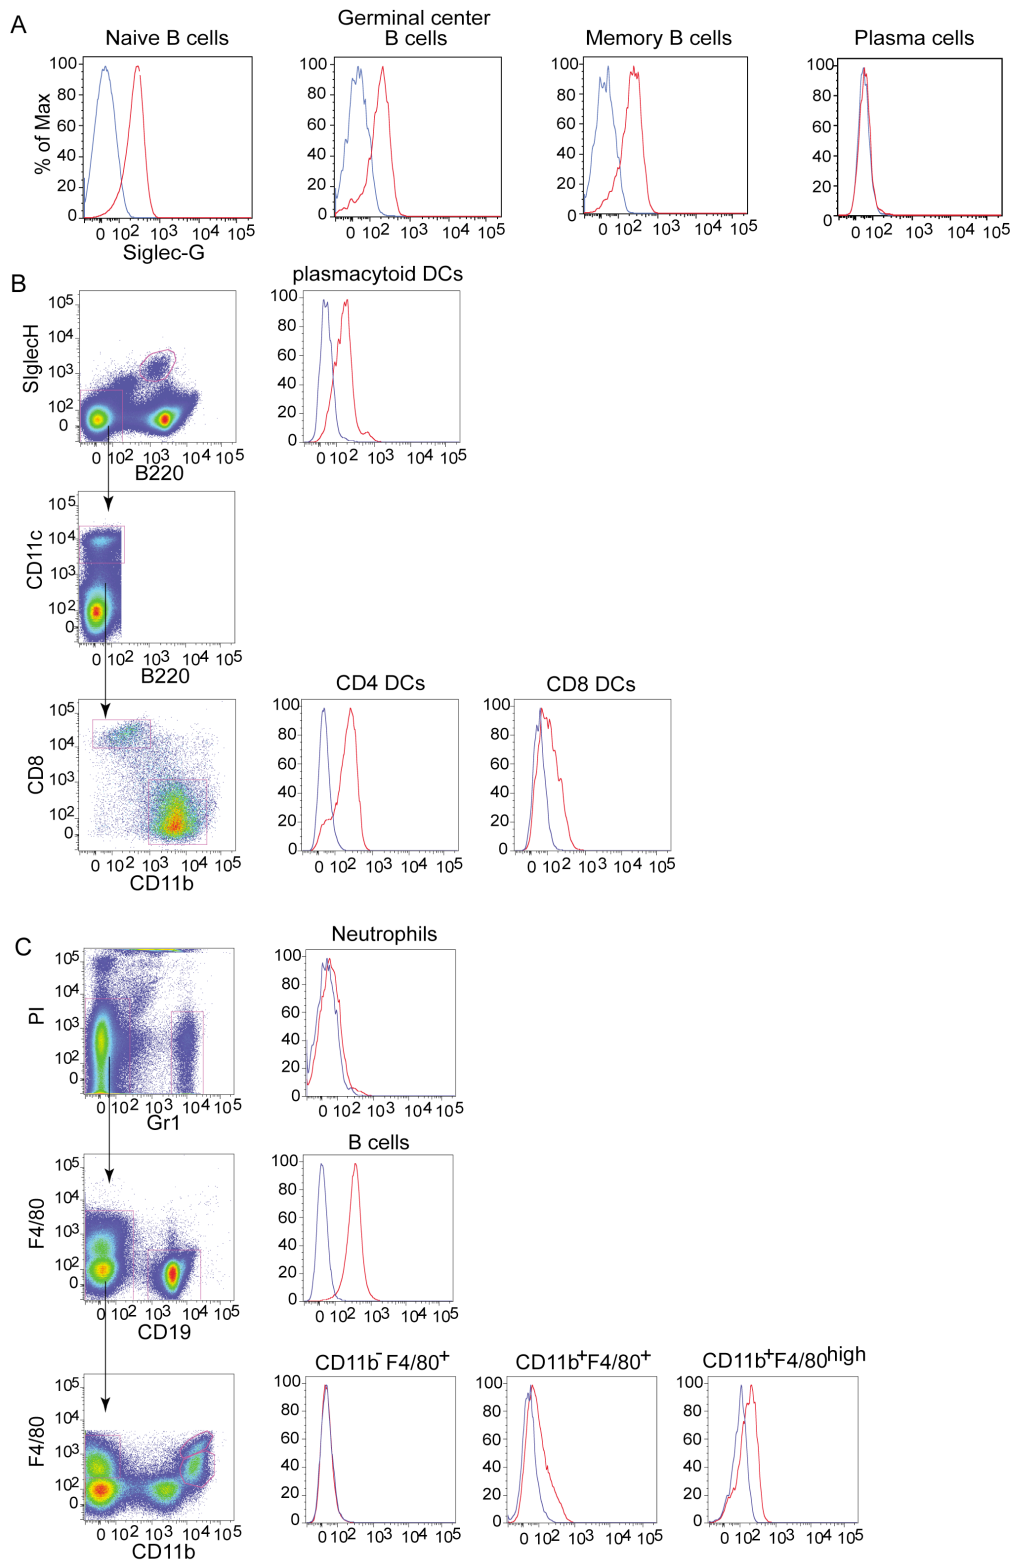

**Figure S11. Analysis of Siglec-G expression on activated B cell subsets, in dendritic cell subsets, and in different cell types in the liver.** *A*, Siglec-G is expressed on naive B cells, germinal center B cells (gated for CD19<sup>+</sup>B220<sup>+</sup>IgM<sup>-</sup>IgD<sup>-</sup>GL7<sup>+</sup>CD38<sup>+</sup>), memory B cells (gated for CD19<sup>+</sup>B220<sup>+</sup>IgM<sup>-</sup>IgD<sup>-</sup>CD80<sup>+</sup>), and plasma cells (gated for B220<sup>+</sup>IgM<sup>-</sup>IgD<sup>-</sup>Ter119<sup>-</sup>Gr1<sup>-</sup>CD11b<sup>-</sup>NK1.1<sup>-</sup>CD3<sup>-</sup>CD138<sup>+</sup>). Cells were isolated from the spleen, stained with the appropriate antibodies for gating along with Alexa 647-conjugated anti-Siglec-G antibody, and analysed by FACS. *B*, Siglec-G is expressed on plasmacytoid DCs, CD11b<sup>+</sup> DCs and CD8<sup>+</sup> DCs with the highest amounts on CD11b<sup>+</sup> DCs. *C*, In the liver, Siglec-G is expressed on B cells and in low amounts on macrophages.

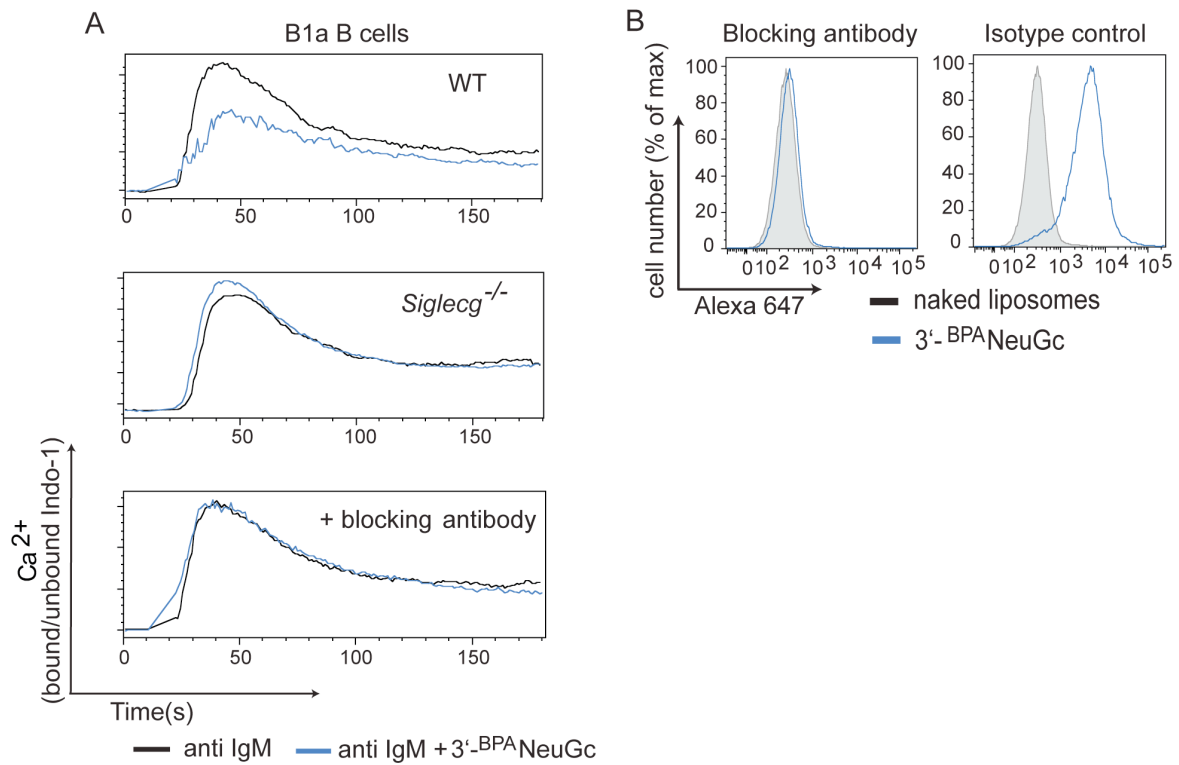

**Figure S12. The Siglec-G antibody blocks the ligand binding site of Siglec-G.** *A*, The inhibition of Ca<sup>2+</sup>-flux by liposomes displaying anti-IgM + 3'-BPA NeuGc in B1a cells from the peritoneal cavity is abrogated in B1a cells from *Siglecg*<sup>-/-</sup> mice and B1a cells pretreated with unlabeled Siglec-G antibody. B1a cells from the peritoneal cavity (B220<sup>low</sup>CD5<sup>+</sup>) were preincubated with the Siglec-G antibody (15 min), stimulated after 10 seconds with liposomes displaying anti-IgM (black line) or anti-IgM + 3'-BPA NeuGc (blue line), and the intracellular Ca<sup>2+</sup>-mobilization was measured by FACS. *B*, The anti-Siglec-G antibody blocks binding of fluorescent liposomes displaying 3'-BPA NeuGc. Splenic B cells were incubated with unlabeled Siglec-G antibody for 15 min, further incubated with Alexa 647-labeled naked liposomes (black line) or 3'-BPA NeuGc liposomes (blue line), washed, and analyzed by FACS.

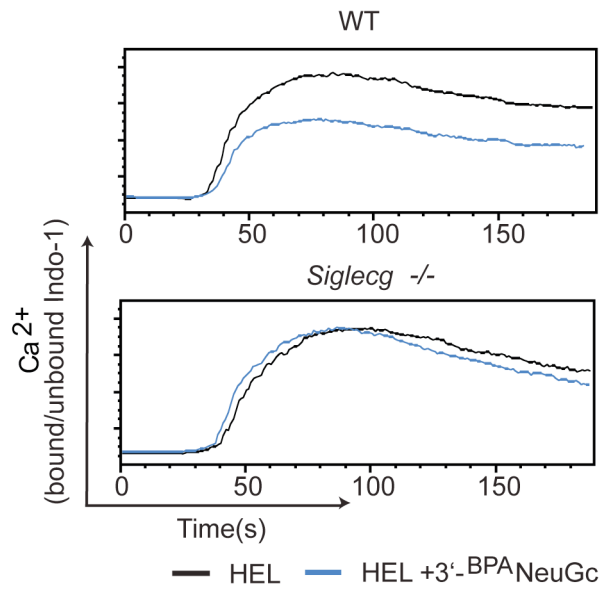

**Figure S13. STALs displaying Siglec-G ligand inhibit intracellular Ca<sup>2+</sup>-mobilization in HEL-specific B cells.** Ca<sup>2+</sup>-flux in purified IgM<sup>HEL</sup> B cells was inhibited after stimulation with liposomes displaying HEL + 3'-BPA<sup>NeuGc</sup> compared to liposomes displaying HEL alone. Inhibition was Siglec-G dependent since no inhibition was observed in Siglec-deficient B cells.

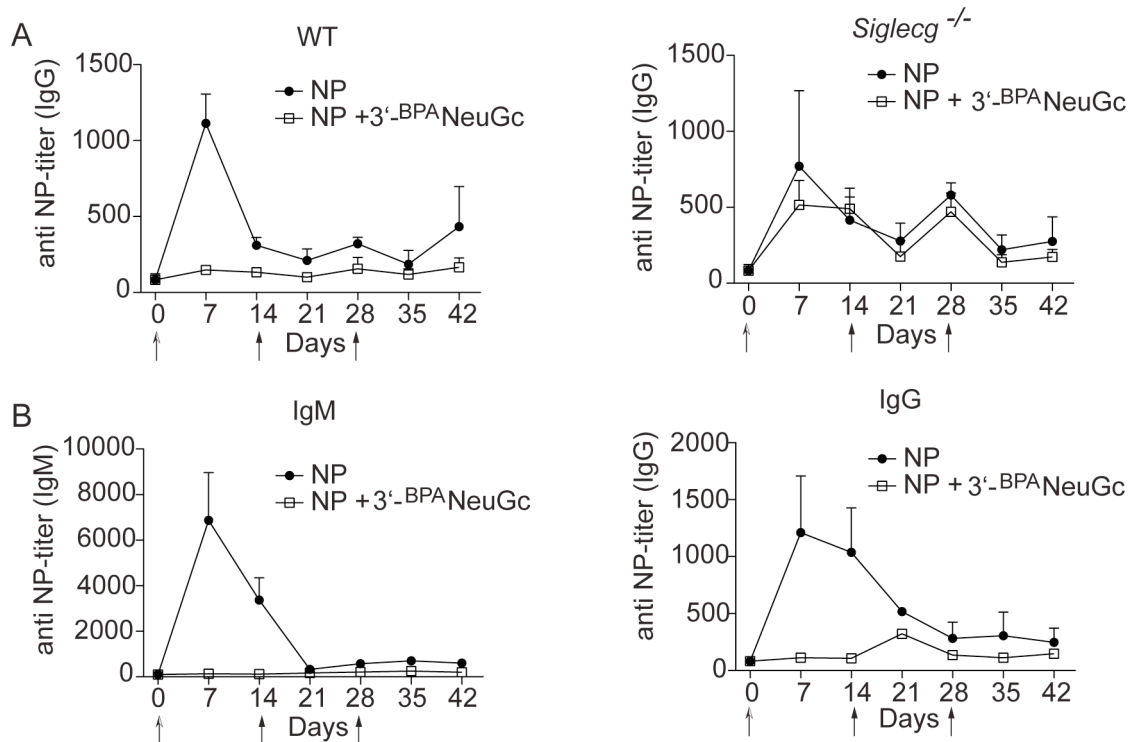

**Figure S14. Liposomes displaying NP and 3'-BPA NeuGc induce tolerance to NP.** A, Production of IgG in *WT* and *SiglecG<sup>-/-</sup>* mice injected intraperitoneally with the indicated liposomes (n=4). B, Production of IgM and IgG in mice injected intravenously with the indicated liposomes (n=4). Mice were injected at day 0 with antigenic liposomes displaying either antigen alone or antigen and Siglec-G ligand. On day 14 and 28 all mice received liposomes with antigen alone. Antibody titers were assessed by ELISA. Data represents mean +/- s.e.m.
